# Supplementary material for: The critical role of the linear plasmid lp36 in the infectious cycle of Borrelia burgdorferi
Source: PubMed Central journal article supplement (PMC1974800; doi:10.1111/j.1365-2958.2007.05746.x), 2007-06-01
Supplement: mmi0064-1358-ts1.pdf [file mmi0064-1358-ts1.pdf]

**Table S1. Determination of ID<sub>50</sub><sup>a</sup>.**

| Target Dose                    | A3-M9 lp36-minus                         | A3-M9 lp36-minus/<br>lp36-gent           | A3-M9 lp36-minus/<br>pBSV2G <i>bbk17</i> | A3-M9 $\Delta$ <i>bbk17::flgB<sub>p</sub>-kan</i> /<br>pBSV2G | A3-M9 $\Delta$ <i>bbk17::flgB<sub>p</sub>-kan</i> /<br>pBSV2G <i>bbk17</i> |
|--------------------------------|------------------------------------------|------------------------------------------|------------------------------------------|---------------------------------------------------------------|----------------------------------------------------------------------------|
| 1x10 <sup>1</sup>              | ND <sup>b</sup>                          | 0/6                                      | ND                                       | ND                                                            | ND                                                                         |
| 1x10 <sup>2</sup>              | ND                                       | 1/6                                      | 1/6                                      | ND                                                            | 0/6                                                                        |
| 1x10 <sup>3</sup>              | ND                                       | 3/6                                      | 3/6                                      | 1/6                                                           | 3/6                                                                        |
| 5x10 <sup>3</sup> <sup>c</sup> | 1 <sup>d</sup> /15                       | 14/15                                    | 15/15                                    | 1/15                                                          | 13/15                                                                      |
| 1x10 <sup>4</sup>              | 0/6                                      | 2/2                                      | 4/6                                      | 5/6                                                           | 6/6                                                                        |
| 1x10 <sup>5</sup>              | 1 <sup>d</sup> /6                        | 2/2                                      | 6/6                                      | 6/6                                                           | 6/6                                                                        |
| 1x10 <sup>6</sup>              | 0/6                                      | 2/2                                      | 6/6                                      | 6/6                                                           | ND                                                                         |
| 1x10 <sup>7</sup>              | 3 <sup>d</sup> /6                        | 2/2                                      | ND                                       | 6/6                                                           | ND                                                                         |
| 1x10 <sup>8</sup>              | 4 <sup>d</sup> /6                        | 2/2                                      | ND                                       | ND                                                            | ND                                                                         |
| ID <sub>50</sub> <sup>e</sup>  | 7.1x10 <sup>6</sup>                      | 9.5x10 <sup>2</sup>                      | 4.1 x10 <sup>2</sup>                     | 8.5 x10 <sup>3</sup>                                          | 6.6 x10 <sup>2</sup>                                                       |
| 95% CI <sup>f</sup>            | 1.1x10 <sup>6</sup> -5.8x10 <sup>7</sup> | 1.5x10 <sup>2</sup> -5.0x10 <sup>3</sup> | 5.5x10 <sup>1</sup> -2.1x10 <sup>3</sup> | 1.8x10 <sup>3</sup> -4.6x10 <sup>4</sup>                      | 9.3x10 <sup>1</sup> -3.3x10 <sup>3</sup>                                   |

<sup>a</sup>Number of mice infected assessed by reisolation of spirochetes from mouse ear, bladder and joint tissues 4 weeks post inoculation/number of mice analyzed. Spirochetes were reisolated from all three tissues unless otherwise noted.

<sup>b</sup>Not Determined.

<sup>c</sup>Includes infection data from a separate experiment in which mice were inoculated with a single target dose of 5x10<sup>3</sup>.

<sup>d</sup>Spirochetes were only reisolated from ear tissue.

<sup>e</sup>Estimated by probit regression on adjusted dose as described in the Experimental Procedures.

<sup>f</sup>95% Confidence Interval.

**Table S2. Primers and Taqman probes used in this study.**

| Primer number | Designation                    | Sequence 5'-3'                      |
|---------------|--------------------------------|-------------------------------------|
| 1             | lp36 F                         | CGTCAAATCTTCTGGGGTG                 |
| 2             | lp36 R                         | CCTATTTCAAGGGCGTGAG                 |
| 3             | <i>flaB<sub>p</sub></i> -BamHI | GGATCCTGTCTGTCGCCTCTTGTGGCTTCCGG    |
| 4             | 3' <i>aacC1</i> -NheI          | GCTAGCCGATCTCGGCTTGAACG             |
| 5             | <i>bbk17</i> -600 5'           | ATGCAAAATGCGGGCATAGAATTCC           |
| 6             | <i>bbk17</i> +500 3'           | AAGGATGCTATTAAGCGGAGCCG             |
| 7             | <i>bbk17</i> -12045-SalI 3'    | ACGCGTCGACGGATTATTAATTGTGTGTCTGGCAG |
| 8             | <i>bbk17</i> -10242-SalI 5'    | ACGCGTCGACCTTAAATTATAGCGCAAAGTGCCAG |
| 9             | <i>flgBP<sub>o</sub></i> XhoI  | TAATACTCGAGCTTCAAGGAAGATT           |
| 10            | <i>Kan</i> term- XhoI          | ATCTCGAGCTAGCGCCGTCCCGTCAA          |
| 11            | <i>bbk17</i> -KpnI 5'          | CGGGGTACCCTTTGCGCTATAATTTAAGT       |
| 12            | <i>bbk17</i> -BamHI 3'         | CGCGGATCCAAAACTTTTGAGTTCCTTC        |
| 13            | <i>flaB</i> FWD                | TCTTTTCTCTGGTGAGGGAGCT              |
| 14            | <i>flaB</i> REV                | TCCTTCCTGTTGAACACCCTCT              |

---

|    |                |                      |
|----|----------------|----------------------|
| 15 | <i>nid</i> FWD | CACCCAGCTTCGGCTCAGTA |
| 16 | <i>nid</i> REV | TCCCCAGGCCATCGGT     |

---

| Probe number | Designation              | Sequence 5'-3'                       |
|--------------|--------------------------|--------------------------------------|
| 1            | <i>flaB</i> Taqman probe | 6-FAM-AAACTGCTCAGGCTGCACCGGTTT-TAMRA |
| 2            | <i>nid</i> Taqman probe  | 6-FAM-CGCCTTTCCTGGCTGACTTGGACA-TAMRA |

---
